# Supplementary material
Source: PubMed Central journal article supplement (PMC9918378)
Supplement: BLT-21-003_OnlineSupplementaryContent.pdf [file BLT-21-003_OnlineSupplementaryContent.pdf]

ONLINE SUPPLEMENTARY CONTENT

### Original Design

**A: General Blood Administration Order Set**

**B: OR Blood Administration Order Set**

**C: Oncology/BMT/Sickle Cell Blood Order Set**

**D: Prepare order**

**E: Transfuse order**

### User-Centered Design

**F: Combined Blood Administration Order Set (Collapsed)**

**G: Combined Blood Administration Order Set (Expanded)**

**H: Prepare order**

**I: Transfuse order**

Figure S1 - Change in blood product orders and order sets after user-centered design process

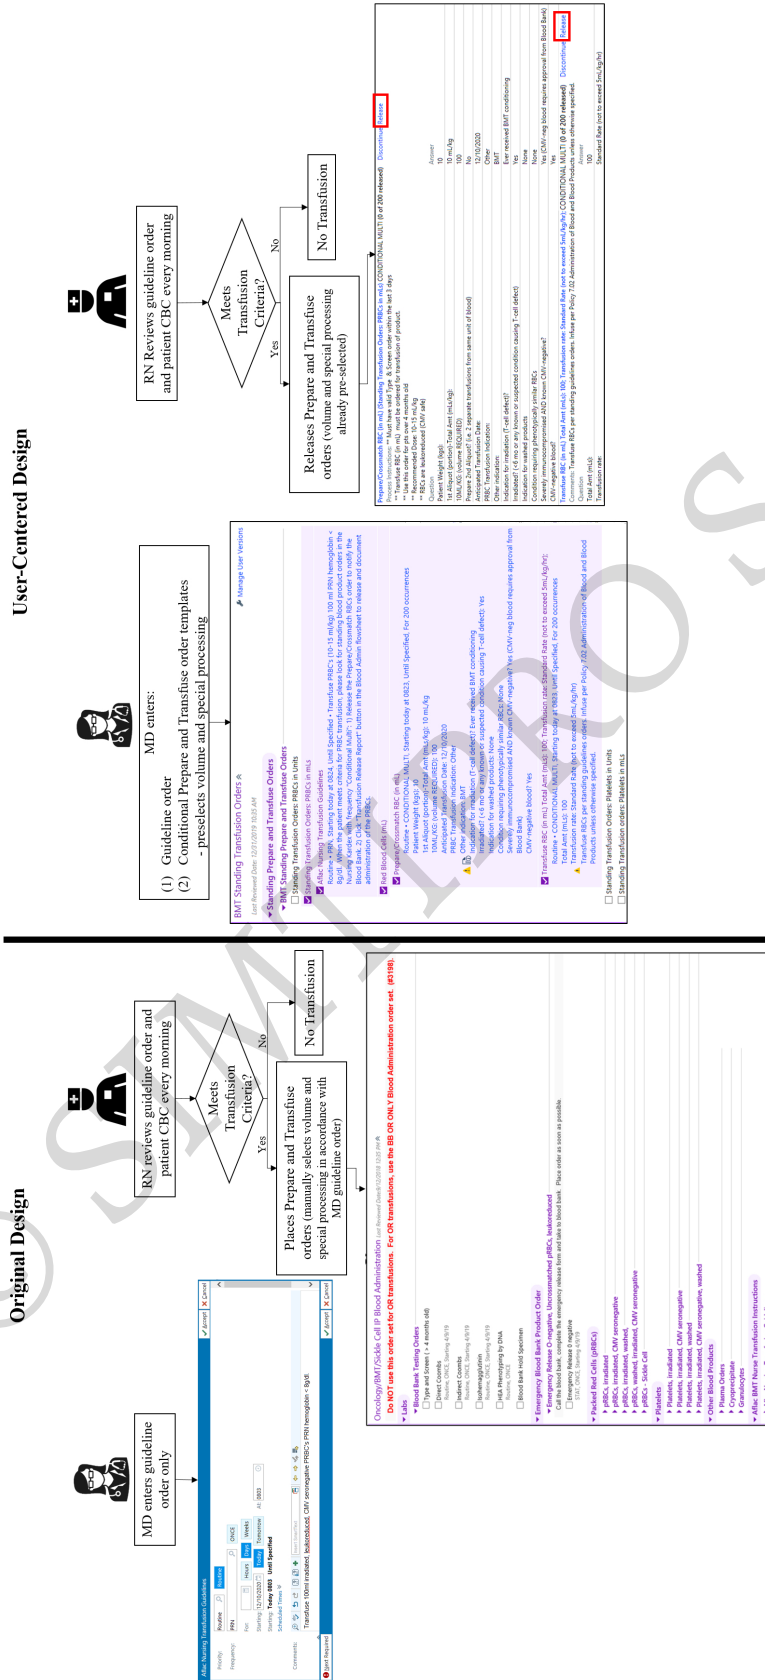

Figure S2 - Change in Bone Marrow Transplant ordering workflow pre- and post-intervention
